# Supplementary material
Source: PubMed Central journal article supplement (PMC4943471)
Supplement: Supp_Figure1.pdf [file Supp_Figure1.pdf]

## Supplementary Data

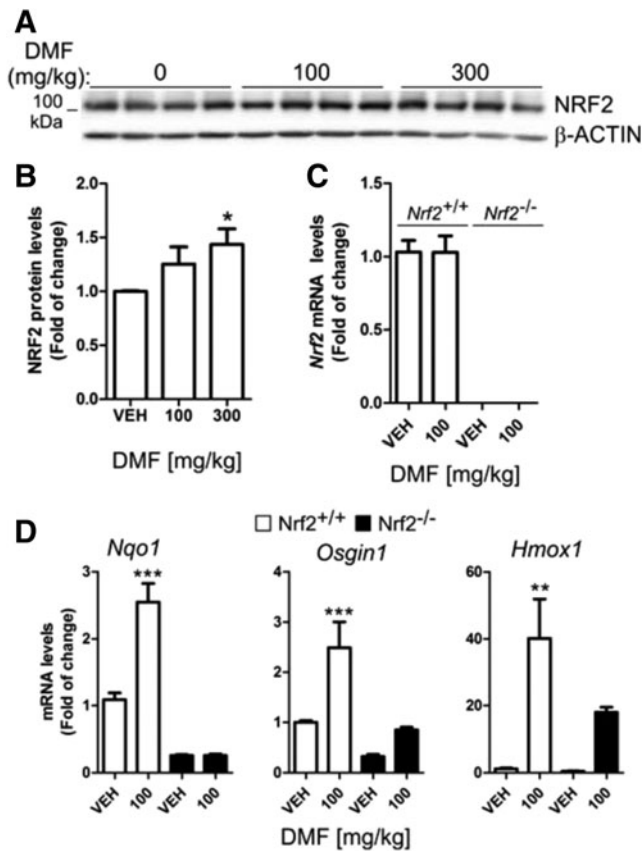

**SUPPLEMENTARY FIG. S1. Induction of NRF2 signature by DMF in kidney.** Mice received 100 mg/kg or 300 mg/kg intragastric doses of DMF and were sacrificed 4 h later ( $n=4$  animals per group). **(A)**, NRF2 protein levels. **(B)**, densitometric quantification of protein levels from representative immunoblots of A. **(C)**, qRT-PCR determination of mRNA levels of *Nrf2* in *Nrf2*<sup>+/+</sup> and *Nrf2*<sup>-/-</sup> mice as indicated ( $n=4$  animals per group). **(D)**, qRT-PCR determination of mRNA levels of NRF2-regulated genes *Nqo1*, *Osgin-1*, and *Hmox1* (coding HO-1), respectively, normalized by  $\beta$ -actin. One-way ANOVA followed by Newman-Keuls post-test was used to assess significant differences among groups. Asterisks denote significant differences with  $*p < 0.05$ ,  $**p < 0.01$ , and  $***p < 0.001$  comparing the indicated groups. DMF, dimethyl fumarate; qRT-PCR, quantitative real-time polymerase chain reaction.
