# Supplementary material
Source: PubMed Central journal article supplement (PMC4943471)
Supplement: Supp_Figure2.pdf [file Supp_Figure2.pdf]

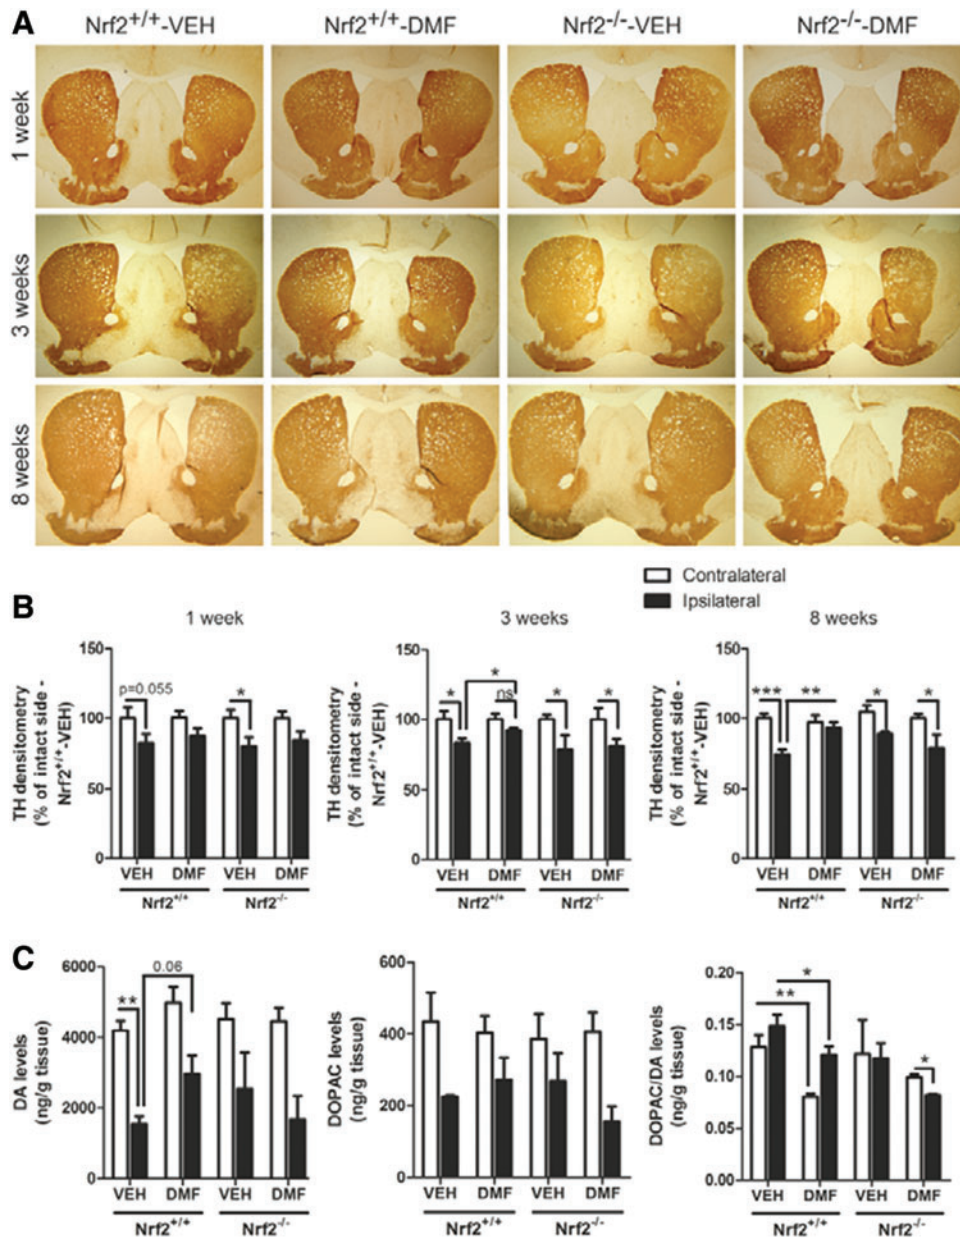

**SUPPLEMENTARY FIG. S2. DMF protects against loss of striatal TH+ fibers.** (A), immunohistochemistry with anti-TH antibody. (B), densitometric estimation of striatal dopaminergic terminals ( $n=4-6$  animals per group). One-way ANOVA followed by Newman-Keuls post-test was used to assess significant differences among groups. Asterisks denote significant differences  $*p < 0.05$ ,  $**p < 0.01$ , and  $***p < 0.001$  comparing the indicated groups. (C) DA and DOPAC and DOPAC/DA levels in STR from Nrf2<sup>+/+</sup> and Nrf2<sup>-/-</sup> mice at 3 weeks ( $n=3$  animals per group). Differences among groups were assessed by two-way ANOVA followed by Bonferroni's test. Asterisks denote significant differences with  $*p < 0.05$ ,  $**p < 0.01$  comparing the indicated groups. DA, dopamine; DOPAC, 3,4-dihydroxyphenylacetic acid.
