# Supplementary material
Source: PubMed Central journal article supplement (PMC4943471)
Supplement: Supp_Figure4.pdf [file Supp_Figure4.pdf]

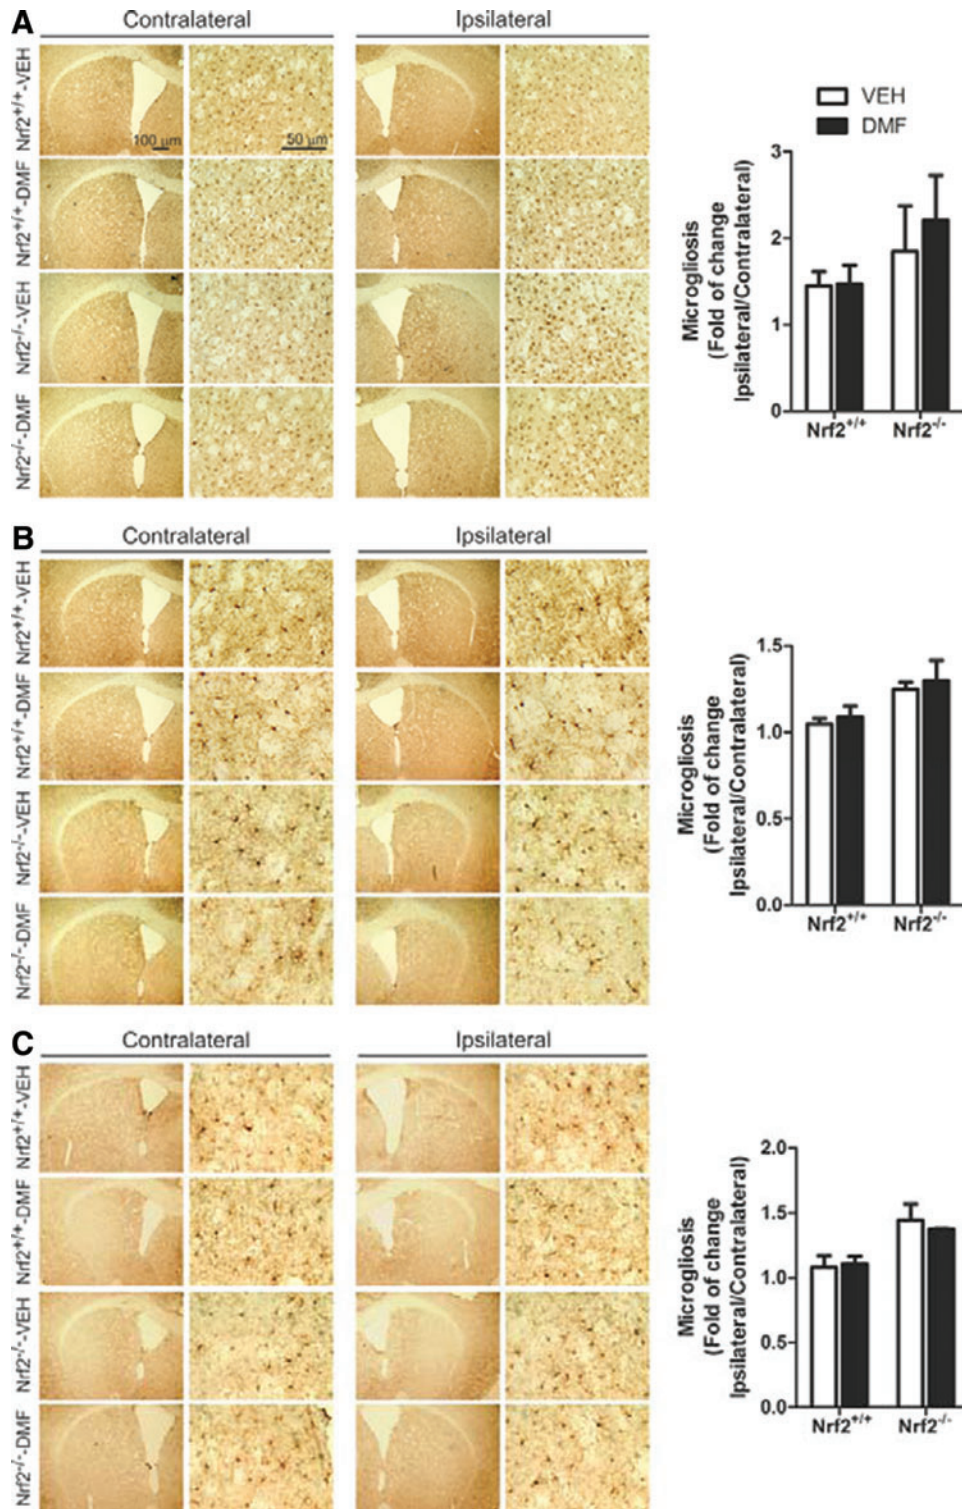

**SUPPLEMENTARY FIG. S4. The STR of  $Nrf2^{+/+}$  and  $Nrf2^{-/-}$  mice injected with rAAV6- $\alpha$ -SYN did not present microgliosis.** Photographs show immunohistochemistry for Iba1 microglia marker of 30  $\mu$ m-thick sections of striatum from  $Nrf2^{+/+}$  and  $Nrf2^{-/-}$  mice after 1 week (A), 3 weeks (B), and 8 weeks (C) from injection with rAAV6- $\alpha$ -SYN and DMF treatment. Quantification of microglia is given as ratio of the number of astrocytes between the ipsilateral and contralateral sides ( $n = 4-6$  animals per group). Differences among groups were assessed by two-way ANOVA followed by Bonferroni's test. Differences were not statistically significant.
