# Supplementary material
Source: PubMed Central journal article supplement (PMC4943471)
Supplement: Supp_Figure5.pdf [file Supp_Figure5.pdf]

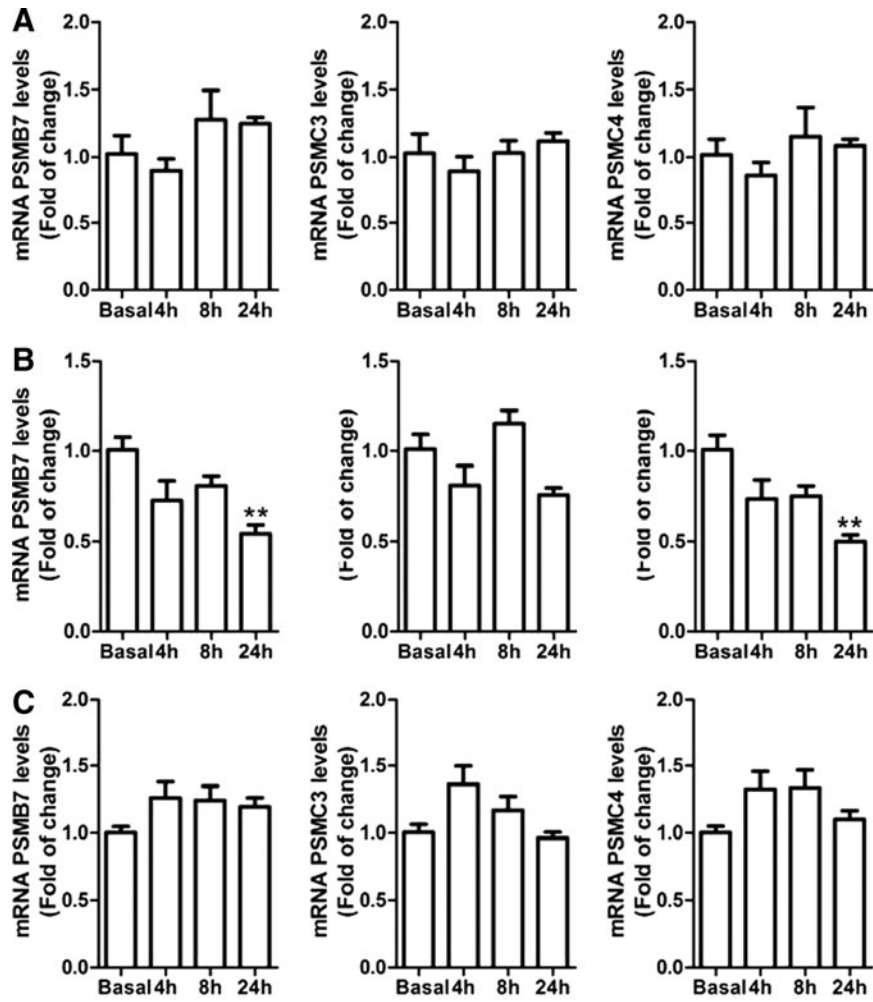

**SUPPLEMENTARY FIG. S5. DMF did not modify the expression of proteasome genes.** qRT-PCR determination of mRNA levels of proteasome subunits coding *PsmB7*, *PsmC3*, and *PsmC4*, normalized by  $\beta$ -actin. (A), dopaminergic MN9D. (B), microglial BV2 and (C), astrocytic IMA2.1 cell lines were treated with DMF ( $20 \mu M$ ) for 4, 8, and 24 h. Differences among groups were assessed by two-way ANOVA followed by Bonferroni's test. Asterisks denote significant differences with  $**p < 0.01$  comparing the basal group.
