# Supplementary material
Source: PubMed Central journal article supplement (PMC4943471)
Supplement: Supp_Figure6.pdf [file Supp_Figure6.pdf]

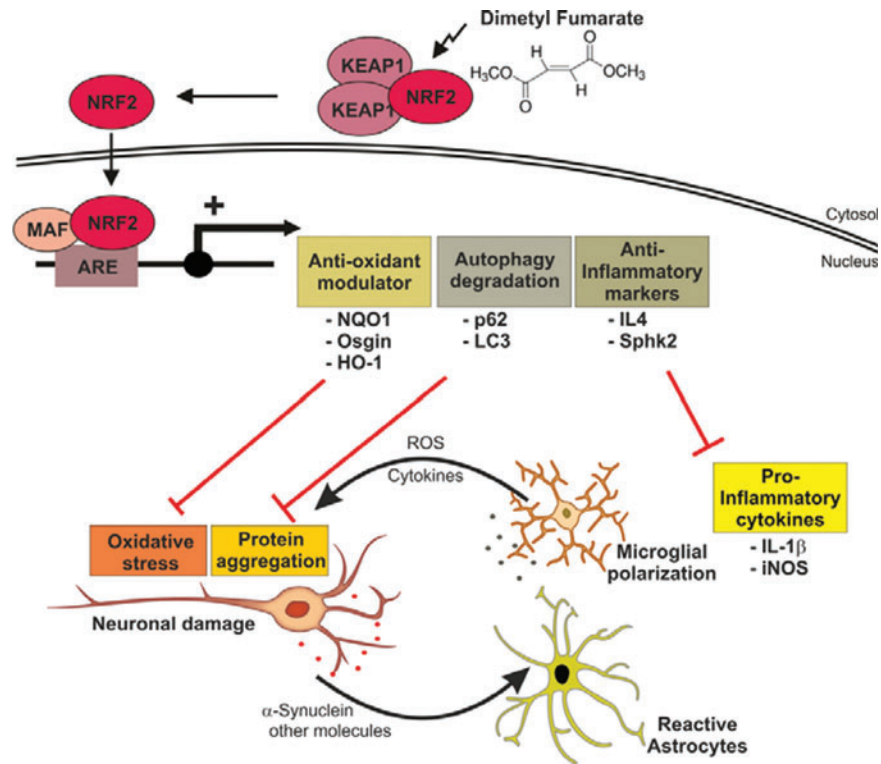

**SUPPLEMENTARY FIG. S6. DMF effects on PD mouse model.** Diagram of the molecular events triggered by  $\alpha$ -SYN and the protective way of action of DMF through NRF2 activation. PD, Parkinson's disease.
