# Supplementary material
Source: PubMed Central journal article supplement (PMC4943471)
Supplement: Supp_Table1.pdf [file Supp_Table1.pdf]

SUPPLEMENTARY TABLE S1. LIST OF ANTIBODIES USED IN THIS STUDY

| <i>Antibody</i>     | <i>Source</i>                  | <i>Catalog number</i> | <i>Dilution</i> |
|---------------------|--------------------------------|-----------------------|-----------------|
| $\alpha$ -synuclein | Merck-Millipore                | AB5038P               | 1:2000 (IHC)    |
|                     | Santa Cruz Biotechnologies     | sc-12767              | 1:500 (IF)      |
| $\beta$ -ACTIN      | Santa Cruz Biotechnologies     | sc-1616               | 1:5000          |
| GAPDH               | Merck-Millipore                | CB1001                | 1:15.000        |
| GFAP                | DakoCytomation                 | Z0334                 | 1:500 (IHC)     |
| HO-1                | Dr. Cuadrado's lab (Home-made) | -                     | 1:2000          |
| Iba1                | Wako Chemicals                 | 019-19741             | 1:500 (IHC)     |
| Inos                | Santa Cruz Biotechnologies     | sc-650                | 1:1000          |
| IL-1 $\beta$        | R&D systems                    | AF-401-NA             | 1:2000          |
| LC3                 | NanoTools                      | 0260-100              | 1:100 (IF)      |
|                     |                                |                       | 1:500 (WB)      |
| NRF2                | Dr. Cuadrado's lab (Home-made) | -                     | 1:2000          |
| NQO1                | Abcam                          | ab2346                | 1:1000          |
|                     | Abcam                          |                       | 1:50 (IHC)      |
| OSGIN-1             | Biorbyt                        | Orb100666             | 1:500           |
| p62/SQSTM1          | Sigma-Aldrich                  | P0067                 | 1:1000          |
|                     |                                |                       | 1:100 (IHC)     |
| TH                  | Merck-Millipore                | MAB5280               | 1:500 (IHC)     |
