# Supplementary material
Source: PubMed Central journal article supplement (PMC4943471)
Supplement: Supp_Table2.pdf [file Supp_Table2.pdf]

SUPPLEMENTARY TABLE S2. LIST OF PRIMERS USED FOR QUANTITATIVE REAL-TIME POLYMERASE CHAIN REACTION

| <i>Gene product</i> | <i>Forward primer</i>         | <i>Reverse primer</i>          |
|---------------------|-------------------------------|--------------------------------|
| $\beta$ -actin      | 5' TCCTTCCTGGGCATGGAG 3'      | 5' AGGAGGAGCAATGATCTTGATCTT 3' |
| Ho-1                | 5' CACAGATGGCGTCACTTCGTC 3'   | 5' GTGAGGACCCACTGGAGGAG 3'     |
| Il-1 $\beta$        | 5' CTGGTGTGTGACGTTCCCATTA 3'  | 5' CCGACAGCACGAGGCTTT 3'       |
| Il-4                | 5' ACAGGAGAAGGGACGCCAT 3'     | 5' GAAGCCCTACAGACGAGCTCA 3'    |
| iNos                | 5' CCTCCTTTGCCTCTCACTCTTC 3'  | 5' AGTATTAGAGCGGTGGCATGGT 3'   |
| Nqo1                | 5' GGTAGCGGCTCCATGTACTC 3'    | 5' CATCCTTCCAGGATCTGCAT 3'     |
| Nrf2                | 5' CCCGAAGCACGCTGAAGGCA 3'    | 5' CCAGGCGGTGGGTCTCCGTA 3'     |
| Osgin-1             | 5' CGGTGACATCGCCCACTAC 3'     | 5' GCTCGGACTTAGCCCACTC 3'      |
| p62/Sqstm1          | 5' GGCGCACTACCGCGATGAGGA 3'   | 5' TGTTCGCGCCGCACTCCTT 3'      |
| Psmb7               | 5' TCTTCGTCCATTCTCAGTGCC 3'   | 5' GTAACCTTCTCGGTGAGGACAGC 3'  |
| Psmc3               | 5' GCTCGGTGCACTGATGACTTC 3'   | 5' CATGAGTGAGTTCCGTGGCTC 3'    |
| Psmc4               | 5' GGCCCGTCCAGATAAAGATTTTC 3' | 5' TCCTTGGCCAGGACAATGTAG 3'    |
| Sphk2               | 5' ATATTCATGGGGGCGTGTCCAG 3'  | 5' TCCTGGACCAGCCTCTGGGTGT 3'   |
